# Supplementary material for: A Chimera Na+-Pump Rhodopsin as an Effective Optogenetic Silencer
Source: PubMed Central journal article supplement (PMC5115807; doi:10.1371/journal.pone.0166820), 2016-11-18
Supplement: pone.0166820.s001.pdf [file pone.0166820.s001.pdf]

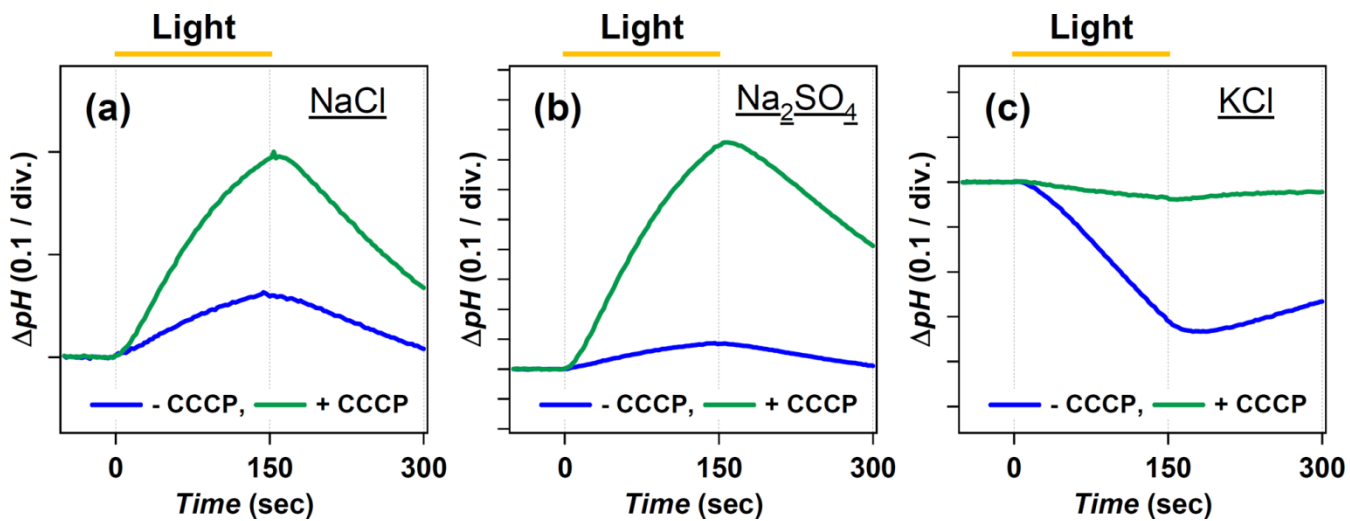

**S1 Fig. Ion-transport activity of  $I_1K_6NaR$ .** (a-c) Light-induced pH changes upon light-illumination (>500 nm, indicated by yellow lines) on the *E. coli* cells expressing  $I_1K_6NaR$  in 100 mM NaCl (a), 100 mM  $\text{Na}_2\text{SO}_4$  (b) and 100 mM KCl (c) without (blue lines) and with CCCP (green lines).
